1 **FINE-SCALE POPULATION GENETIC STRUCTURE OF DENGUE MOSQUITO**  
2 **VECTOR, *Aedes aegypti* AND ITS ASSOCIATION TO LOCAL DENGUE**  
3 **INCIDENCE**

4 Thaddeus M. Carvajal<sup>1, 2, 3</sup>, Kohei Ogishi<sup>1</sup>, Sakiko Yaegeshi<sup>4</sup>, Lara Fides T. Hernandez<sup>1</sup>,  
5 Katherine M. Viacrusis<sup>1</sup> Howell T. Ho<sup>5</sup>, Divina M. Amalin<sup>2,3</sup>, and Kozo Watanabe<sup>1, 2, 3\*</sup>

6 <sup>1</sup> Department of Civil and Environmental Engineering - Ehime University, Matsuyama,  
7 Japan

8 <sup>2</sup> Biology Department – De La Salle University, Taft Ave Manila, Philippines

9 <sup>3</sup> Biological Control Research Unit, Center for Natural Science and Environmental  
10 Research - De La Salle University, Taft Ave Manila, Philippines

11 <sup>4</sup> Department of Civil and Environmental Engineering, University of Yamanashi, Kofu,  
12 Japan

13 <sup>5</sup> Office of the Vice President of Academic Affairs, Trinity University of Asia, Quezon City,  
14 Philippines

15 \*Corresponding author

16 Email: [watanabe\\_kozo@cee.ehime-u.ac.jp](mailto:watanabe_kozo@cee.ehime-u.ac.jp) (KW)

17 **ABSTRACT**

18 Dengue fever is an important arthropod-borne disease which is transmitted by the mosquito  
19 vector, *Aedes aegypti*. Vector control programs rely heavily on targeting the mosquito  
20 vector in order to stop the disease transmission cycle. Hence, the present study conducted a  
21 fine-scale population genetics of *Ae. aegypti* in a highly urbanized and dengue endemic

22 region in the Philippines. Furthermore, the study also explored the correlation of population  
23 genetic indices to the local dengue incidence of the region. The genetic diversity and  
24 population structure of *Ae. aegypti* populations were analyzed by genotyping 11  
25 microsatellite loci from 526 adult mosquitoes sampled in 21 study areas in Metropolitan  
26 Manila. Five genetic indices and its dengue incidence were then correlated using Pearson's  
27 correlation. Results showed low genetic differentiation among mosquito populations  
28 indicating high gene flow activity in the region. However, the study also revealed a  
29 considerable number of inferred genetic clusters (K=5). The constructed UPGMA  
30 dendrogram exhibited close proximity of genetically-similar *Ae. aegypti* mosquito  
31 populations that extends in long distances suggesting passive dispersal ability of the  
32 mosquito vector. Moreover, a positive and significant correlation was observed between  
33 dengue incidence and inbreeding coefficient (*F*<sub>is</sub>) ( $r = 0.52$ ,  $p = 0.02$ ). Overall, the study  
34 showed that population genetic structuring can occur in a fine-scale area which consisted  
35 notable clustering and extending patterns of genetically-similar mosquito populations. This  
36 infers the potential migration ability of *Ae. aegypti* in different locations of the region  
37 where specific vector control zones could be carried out to disrupt its dispersal ability. Also,  
38 this is the first study that attempted to correlate genetic indices to dengue incidence that  
39 could serve as a supplementary index in identifying high dengue risk areas in the future.

#### 40 **AUTHOR SUMMARY**

41 Dengue disease puts billions of people worldwide at risk. To mitigate this risk, population  
42 genetic studies of its vector, *Aedes aegypti*, are being conducted. The information  
43 established from these studies can be utilized to reduce mosquito population and thereby,  
44 reduce the opportunity for dengue transmission. In this study, we used microsatellite  
45 markers to determine genetic structure and diversity followed by correlation analyses  
46 between genetic indices and dengue incidence. Results show a low genetic differentiation  
47 among mosquito populations in Metro Manila; it also indicates population genetic  
48 structuring in a fine-scale area. This suggest a pattern of migration activity of *Ae. aegypti*  
49 which can be used to mitigate dengue transmission. Moreover, the study also explored in

50 correlating genetic indices and local dengue incidence where it demonstrated significant  
51 correlation with the inbreeding coefficient ( $F_{is}$ ). Further investigation is needed on how  
52 these genetic indices may be utilized in predicting and identifying high dengue risk areas in  
53 endemic areas.

## 54 INTRODUCTION

55 Dengue disease is the most prevalent mosquito-borne viral infection in tropical and  
56 subtropical countries [1] with approximately 2.5 billion people worldwide at risk of  
57 contracting the disease [2]. Dengue virus is transmitted primarily to humans by the  
58 principal mosquito vector, *Aedes aegypti*. This mosquito species is considered to be the  
59 most efficient vector of arboviruses because of its highly adaptive nature to the urban  
60 environment [3]. Although a dengue vaccine is available [4], the World Health  
61 Organization [2] still recommends disease prevention and control towards the mosquito  
62 vector.

63 Molecular genotyping of the mosquito vector using microsatellites has provided  
64 useful insights towards the improvement of mosquito vector control strategies [5,6]. For  
65 instance, revealing the gene flow pattern among *Ae. aegypti* populations can be interpreted  
66 as the mosquito vector's dispersal pattern [7,8]. Microsatellites is widely used as the  
67 standard molecular marker of choice in population genetic studies of *Ae. aegypti* [9]. Due to  
68 the marker's high polymorphism, co-dominance, and broad genome distribution [10], it has  
69 been deemed suitable for differentiating both macro- and micro-geographic scale mosquito  
70 populations [11,12,13].

71 Despite the many population genetic studies of *Ae. aegypti* using microsatellites  
72 worldwide, only a handful of studies have investigated the vector's genetic structure in a  
73 fine-scale area [7,11,12,13,14,15,16]. These fine-scale studies are defined as having  
74 sampling points within city boundaries, or villages with geographic distances of less than  
75 50 km. For instance, spatial genetic differentiation across *Ae. aegypti* populations was  
76 evident in spatial scales within city boundaries [7,11,12,16], among villages [13,14] and

77 along a street [15]. It has been claimed that genetic divergence in small spatial scales is  
78 common in Southeast Asia [11] and could also be attributed to the type of breeding sites  
79 [15]. Furthermore, multiple inferred clusters of genetic mosquito populations ( $K= 3-9$ )  
80 were also detected within these fine-scale areas [11,14,16]. It was suggested that a single  
81 house or groups of closely situated houses may act as assembling units in forming these  
82 genetic clusters [11].

83 The information and patterns identified by the population genetic approach can be  
84 factored as part of the strategy in reducing the mosquito population, thereby, decreasing the  
85 opportunity of dengue transmission. Early fine-scale population genetic studies of *Ae.*  
86 *aegypti* [7,8,11,15] had only demonstrated the degree or magnitude of genetic structuring  
87 while recent studies [12,16] concentrated on hypothesis testing such as the role  
88 urbanization in genetic divergence [14]. Although the results provided relative insights to  
89 our understanding of the mosquito vector, it lacks in demonstrating the clustering or  
90 distribution of genetically-similar mosquito populations which can reveal notable patterns  
91 for its application in vector control. For instance, in Yuunan Province of China, *Ae. aegypti*  
92 populations from border areas of the region are genetically-similar among each other and  
93 distinct from its two main cities indicating different invasion and colonization conduits [17].  
94 The findings was presented simply in a dendrogram which can used in creating a sound  
95 basis in disrupting possible invasion of this mosquito vector from neighboring countries. In  
96 previous fine-scale population genetic studies, such graphical presentation was not  
97 illustrated but only described or portrayed in tabular records of pairwise genetic differences  
98 (e.g.  $F_{ST}$ , Nei's genetic distance). Illustrating how geographical locations are genetically-  
99 similar or distinct may demonstrate the migration activity of *Ae. aegypti* and the extent of  
100 its spatial distribution patterns in fine-scale areas.

101 Surveillance of the immature or adult stages of *Ae. aegypti* has led to the conception  
102 of vector indices (e.g. Container, House, Breteau, Pupal or Adult indices) which can be  
103 utilized as a potential predictor of local dengue epidemiology [18]. However, frequent or  
104 consistent sampling of immature or adult stages of the mosquito vector has proven to be

105 laborious and cost intensive [19]. Innovative and alternative avenues are now being  
106 explored in determining the population size of *Ae. aegypti* such as the development of non-  
107 powered passive adult traps [20] and utilizing container-inhabiting mosquito simulation  
108 approach [21,22]. One avenue that has not been explored is the application of genetic  
109 indices that characterizes the mosquito vector population. For example, population genetics  
110 can estimate the effective population size ( $N_e$ ) of the mosquito vector which is related to its  
111 consensus size [23]. With several population genetic studies that have reported the  
112 estimated population sizes of local *Ae. aegypti* populations [9,13,24], no study had  
113 associated  $N_e$  or other genetic indices to the local dengue incidence. It was demonstrated  
114 that sampling 25-30 individuals per local area is suitable for microsatellite-based  
115 population genetic studies [25] where genetic analyses can determine mosquito population  
116 size by conducting specific sampling episodes as compared to frequent or regular mosquito  
117 collection surveillance.

118 Therefore, the present study has two objectives. First, it determines the population  
119 genetic structure of *Ae. aegypti* within a fine-scale area and, second, it explores the  
120 correlation of population genetic indices to the local dengue incidence. The results can  
121 provide a basis of creating new and innovative approaches in controlling this mosquito  
122 vector in highly urbanized or endemic areas in the Philippines.

## 123 **METHODS**

### 124 *Study area and Mosquito sampling*

125 Metropolitan Manila, a highly urbanized area, is the National Capital Region (NCR)  
126 of the Philippines with an area of 636 km<sup>2</sup>. It is located at the eastern shore of Manila Bay  
127 in Southwestern Luzon (14°50' N Latitude, 121°E Longitude), Philippines, Southeast Asia.  
128 It is composed of 16 cities and 1 municipality with a total population of 12,877,253 [26].  
129 This area is the most urbanized region in the Philippines being the center of the national  
130 government, economy, education and culture, country's leading business center, largest  
131 manufacturing location and principal port for importation and exportation [27].

132 In this study, Metropolitan Manila was divided into 21 study areas (Figure 1 and  
133 Table S1). Initially, study areas are delineated per city which represents at least one per city.  
134 However, some cities comprised of either a large or small land sized area, thus designating  
135 more study areas. For example, the largest city, Quezon City, in the region was divided into  
136 5 study areas based on its district boundaries. In order to standardize the land size covered  
137 by each study area, we merged two small neighboring cities, San Juan and Mandaluyong.  
138 The map layer of the administrative city boundaries of Metropolitan Manila was  
139 obtained from the Philippine Geographic Information System (GIS) Data Clearinghouse  
140 for further analysis [28].

141 Households on each study area were selected based on voluntary informed consent  
142 in collecting adult *Ae. aegypti* mosquitoes inside their premises. The number of households  
143 per study area ranged from 2 – 14 with an average of 6 households and a total of 134  
144 households. The maximum distance among households within study areas ranged from 1.39  
145 km to 6.17 km. Since the households are widely dispersed within each study area, we  
146 calculated the geographical midpoint (<http://www.geomidpoint.com/>) to assign a single  
147 georeferenced location for each study area in subsequent genetic analysis. The distance  
148 among study areas (midpoints) ranged from 2.85 – 39.66 km.

149 Collection of *Ae. aegypti* mosquitoes was done by installing a commercially  
150 available mosquito UV Light Trap (Jocanima ©) in each household's outdoor premises for  
151 3-5 days. Collected adult mosquito individuals were sorted, then identified accordingly  
152 based on the pictorial keys of Rueda et al. [29] and preserved in 99% ethanol. Majority of  
153 population genetic studies in *Ae. aegypti* have either used only larval or reared larval to  
154 adult samples. For this reason, this could lead to a potential bias in estimating population  
155 genetic parameters due to the sampling of full sibling mosquito larvae [30]. This was  
156 evidence in the population genetic structure of amphibian larval samples that led to  
157 inaccurate estimate of differentiation among populations when compared to adult samples

158 [31,32]. As such, this study targets adult *Ae. aegypti* samples than conventional egg, or  
159 larval samples to prevent collecting mosquito full siblings. From a collection period of May  
160 2014 until January 2015, a total of 526 adult *Ae. aegypti* were collected and ranging from  
161 12 to 42 individuals per study area (Table S1).

### 162 DNA Extraction and microsatellite genotyping

163 The total genomic DNA of individual mosquito sample was extracted using the  
164 QIAGEN Blood and Tissue DNEasy Kit following the modified protocol of Crane [33].  
165 We identified 11 microsatellites from Slotman et al. [34] and Chambers et al. [10] for  
166 genotyping and grouped them accordingly into four sets for multiplex PCR (Table S2).  
167 Each set consisted fluorescent labeled forward primers with different annealing  
168 temperatures during the amplification process. Generally, each set composed of 1.2  $\mu$ L of  
169 10X buffer (TAKARA), 0.8  $\mu$ L of 25 mM  $MgCl_2$ , 1.6  $\mu$ L of 10 mM of each dNTPs, 0.6  $\mu$ L  
170 of 10  $\mu$ M forward and reverse primers and 0.08  $\mu$ L of 5.0U/  $\mu$ L of Taq DNA polymerase  
171 (TAKARA), 1.5  $\mu$ l of 10% Dimethyl sulfoxide (DMSO) and 1  $\mu$ l of template DNA  
172 consisting a final volume of 10  $\mu$ l. Thermocycle conditions are as follows: initial  
173 denaturation step of 94  $^{\circ}$ C for 5 minutes, denaturation step of 94  $^{\circ}$ C for 30 seconds,  
174 annealing step with temperature and duration (in seconds) of each primer set as indicated in  
175 Table S2, extension step of 72  $^{\circ}$ C for 30 seconds following 35 cycles and a final  
176 incubation step of 72  $^{\circ}$ C for 5 minutes. PCR amplicons were checked by electrophoresis in  
177 3% agarose gels stained with Midori Green (Nippon Genetics) and visualized under UV  
178 light using the Chemidoc XRS Chemiluminescent Gel Documentation Cabinet (BIO-RAD).  
179 Prior to fragment size analyses, multiplex PCR products were diluted in 1/15 water and  
180 then pooled together. 1ul of each diluted pool were added with 0.5  $\mu$ l of GS 500 Liz  
181 Internal Size Standard<sup>TM</sup> (Applied Biosystems, USA) and HD formamide for a total  
182 volume of 20  $\mu$ l. Fragment analysis of the amplified products were done using ABI 3500  
183 Genetic Analyzer (Life Technologies) while genotyping is done using GeneMapper  
184 (Applied Biosystems). Microsatellite data were checked for error and the presence of null  
185 alleles with MICROCHECKER [35].

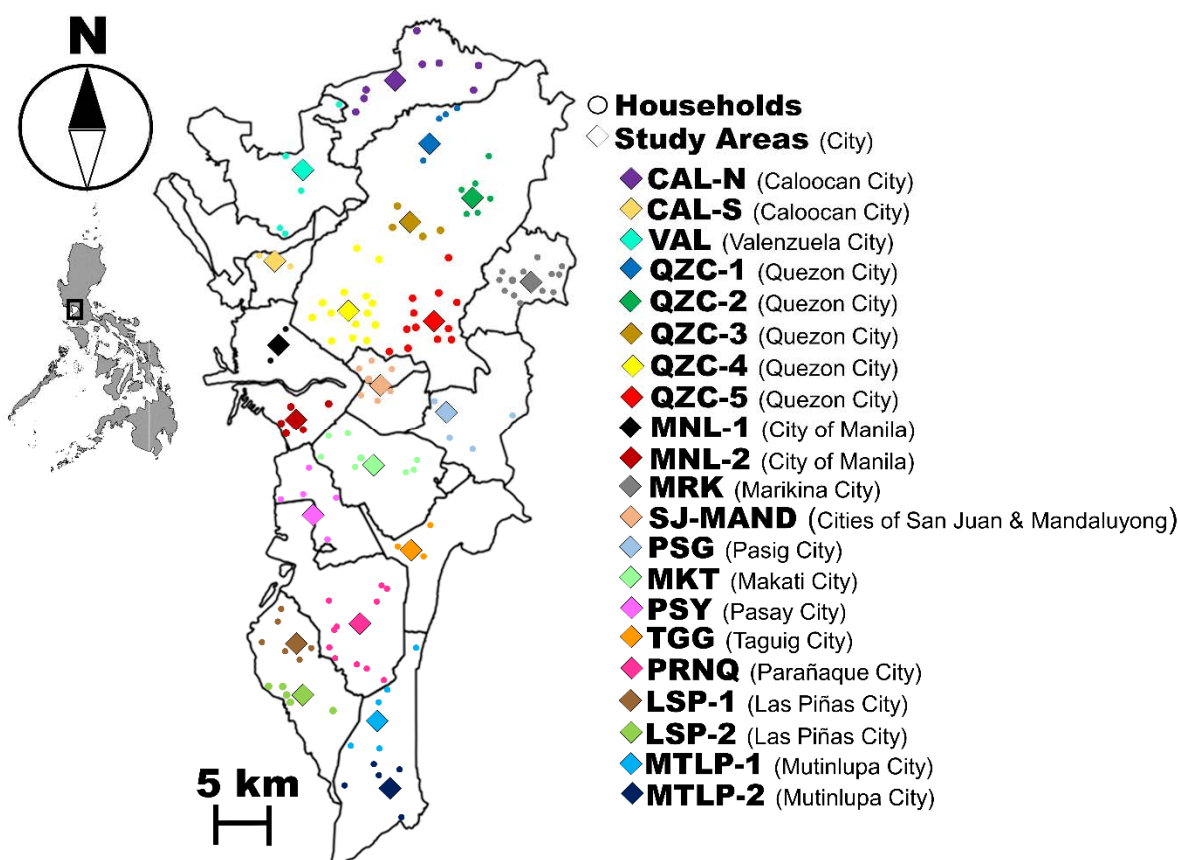

186  
187 **Figure 1. Geographic midpoints of *Ae. aegypti* study areas (◇) with its corresponding**  
188 **household sites (○) in Metropolitan Manila. Details of each study area can be seen in**  
189 **Supplementary Table S1.**

190 The exact Hardy-Weinberg equilibrium (HWE) test and estimations of the Linkage  
191 disequilibrium (LD) among all pairs of loci were conducted using GENEPOP v4.2.1  
192 [36,37]. Significance levels for multiple testing were corrected using the Bonferroni  
193 procedure. The number of alleles, allelic richness and private alleles were calculated using  
194 HPRARE [38,39]. Observed heterozygosity ( $H_o$ ), expected heterozygosity ( $H_e$ ), inbreeding  
195 coefficients ( $F_{is}$ ) were calculated using the Genetic Analysis in Excel (GenAlEx) version



196 6.3 [40]. To assess the magnitude of genetic differentiation among sites, pairwise  $F_{ST}$   
197 values were calculated using Arlequin v3.5.1.3 [41] with 10,000 permutations. Pairwise  
198 gene flow estimates ( $Nm$ ) among sites were manually calculated using the formula of  
199 Slatkin and Barton [42] from the calculated pairwise  $F_{ST}$ . A dendrogram was constructed  
200 based on the pairwise  $F_{ST}$  using the unweighted pair group with arithmetic mean (UPGMA)  
201 in *fastcluster* package [43] and the optimal number of clusters were determined using the  
202 cindex index in the *NbClust* package [44] from the R program [45].

### 203 Genetic Structure

204 The number of genetic clusters (K) was inferred using the Bayesian approach in the  
205 software STRUCTURE v2.3.2 [46]. The admixture model was utilized where its alpha  
206 value was allowed to vary, and independent allele frequencies was set at lambda equals to  
207 one. Twenty (20) independent runs were performed for each value of K (1 – 15) with a  
208 burn-in phase of 200,000 iterations followed by 600,000 replications. Structure Harvester  
209 v0.6.93 [47] was used to determine the most likely number of clusters by calculating  $\Delta K$   
210 [48]. Moreover, the software program CLUMPP v1.1.2 [49] was used to summarize the  
211 results from STRUCTURE and visualized using the program DISTRUCT v1.1 [50].

### 212 Isolation by Distance and Spatial Autocorrelation

213 Pairwise geographic distances (km) among study areas and households were  
214 calculated using the Vincenty's formulae [51] on Microsoft Excel 2016. To test isolation by  
215 distance (IBD), pairwise  $F_{ST}$  and geographic distance (km) among study areas were  
216 examined using Mantel's test of correlation with 10,000 permutations. Spatial  
217 autocorrelation was performed using pairwise Nei's genetic distance among mosquito  
218 individuals and geographic distance (km) among households with 10,000 permutations and  
219 Bootstrap replications. Results of the permutation were considered significant at the 5%  
220 level. In this analysis, a correlogram was produced with 45 distance classes at 1km interval.  
221 Both analyses yielded a correlation coefficient of the two data matrices ranging from -1 to

222 +1, with a test for a significant relationship by random permutation. All analyses were  
223 performed using GenAlEx version 6.3 [40].

#### 224 Correlation Analysis between Genetic indices and Dengue incidence

225 In order to calculate the dengue incidence of each study area, reported dengue cases  
226 per village (*baranggay*) in 2014 were obtained from the National Epidemiology Center of  
227 the Department of Health, Philippines while the population census per village were  
228 acquired from the Philippine Statistics Authority agency ([www.psa.gov.ph](http://www.psa.gov.ph)). Calculation of  
229 dengue incidence was performed by dividing the number of cases to the total population  
230 size for a given year multiplied by a factor of 1,000. Pearson's correlation coefficient was  
231 calculated based from the computed dengue incidence and the selected population genetic  
232 indices namely; Allelic richness, Private Allelic Richness, Observed heterozygosity,  
233 Inbreeding coefficient and the effective population size. The correlation analysis was  
234 performed using the *stats* package of the R program version 3.3.5 [45].

## 235 **RESULTS**

### 236 Genetic Diversity

237 We observed a total of 113 alleles across 11 microsatellite loci in 21 study areas  
238 from Metropolitan Manila (Table S3). The number of alleles per loci ranged from 3 (F06)  
239 to 19 (B07) with an average of 10.25 alleles per loci, suggesting that the chosen  
240 microsatellites markers are highly polymorphic (Table S4). Null alleles were present in 4  
241 loci (M313, AC4, AG7 and H08) and the null allele frequency ranges from 0.00 – 0.33 in  
242 all loci (Table S5). For the 231 tests of HWE of each locus per study area, 91 tests showed  
243 statistically significant deviation ( $p < 0.05$ ) where 72 of these significant deviations  
244 indicated  $H_e > H_o$ , suggesting heterozygosity deficits (Table S3). The LD test showed a  
245 total of 119 of 1155 (10.30%) pairs of loci with significant LD after Bonferroni corrections.

246 Table 2 shows the summary of the genetic diversity per study area. The mean  
247 number of different alleles for all study areas ranged from 3.82 (TGG) to 6.36 (QZC-3)

248 while the mean number of effective alleles for all study areas showed to be 2.74 (QZC-1) to  
 249 3.51 (LSP-2). On the other hand, the mean allelic richness ranged from 3.24 (QZC-1) to  
 250 3.85 (MRK) for all study areas while the proportion of private alleles ranged from 0.02  
 251 (LSP-2) to 0.23 (PSY). Overall, all study areas except for one (MKT) did not conform to  
 252 Hardy-Weinberg equilibrium expectations ( $He > Ho$ ), indicating heterozygosity deficits  
 253 and the possibility of inbreeding within each study area. The effective median population  
 254 size ( $Ne$ ) across all study areas was calculated to be from 6.2 to 4,607 with two study areas  
 255 estimated as an infinite number.

256 **Table 2. Dengue Incidence and Genetic Diversity among 21 *Ae. aegypti* populations**  
 257 **based on 11 Microsatellites in Metropolitan Manila, Philippines**

| Study Areas | Dengue Incidence | Allelic richness | Private allelic richness | Observed Heterozygosity | Inbreeding coefficient (Fis) | Median effective population size ( $Ne$ ) |
|-------------|------------------|------------------|--------------------------|-------------------------|------------------------------|-------------------------------------------|
| CAL-N       | 1.92             | 3.68             | 0.08                     | 0.493                   | 0.169                        | 78.1                                      |
| CAL-S       | 4.76             | 3.49             | 0.11                     | 0.468                   | 0.215                        | 8.5                                       |
| VAL         | 5.22             | 3.49             | 0.04                     | 0.508                   | 0.143                        | 6.2                                       |
| QZC-1       | 0.25             | 3.24             | 0.10                     | 0.470                   | 0.111                        | 116.1                                     |
| QZC-2       | 3.92             | 3.45             | 0.06                     | 0.520                   | 0.047                        | 20.7                                      |
| QZC-3       | 3.26             | 3.44             | 0.03                     | 0.525                   | 0.071                        | 57.7                                      |
| QZC-4       | 3.68             | 3.63             | 0.08                     | 0.541                   | 0.077                        | 86.8                                      |
| QZC-5       | 4.45             | 3.37             | 0.05                     | 0.500                   | 0.117                        | 58.2                                      |
| MNL-1       | 1.32             | 3.53             | 0.08                     | 0.524                   | 0.090                        | 186.7                                     |
| MNL-2       | 3.70             | 3.55             | 0.03                     | 0.468                   | 0.132                        | 386.8                                     |
| MRK         | 3.64             | 3.85             | 0.07                     | 0.511                   | 0.112                        | 4607.1                                    |
| SJ-MND      | 4.08             | 3.29             | 0.03                     | 0.496                   | 0.191                        | 38.1                                      |
| PSG         | 2.81             | 3.56             | 0.08                     | 0.524                   | 0.099                        | 31.7                                      |
| MKT         | 2.02             | 3.59             | 0.06                     | 0.558                   | 0.036                        | ∞                                         |
| PSY         | 3.18             | 3.71             | 0.23                     | 0.506                   | 0.080                        | 477.3                                     |
| TGG         | 3.80             | 3.27             | 0.05                     | 0.536                   | 0.071                        | 24.1                                      |
| PRNQ        | 8.74             | 3.78             | 0.04                     | 0.564                   | 0.076                        | 84.7                                      |
| LSP-1       | 8.37             | 3.65             | 0.12                     | 0.536                   | 0.104                        | 38.4                                      |
| LSP-2       | 8.95             | 3.44             | 0.02                     | 0.432                   | 0.296                        | ∞                                         |
| MTLP-1      | 8.44             | 3.79             | 0.13                     | 0.438                   | 0.240                        | 79.4                                      |
| MTLP-2      | 7.51             | 3.51             | 0.03                     | 0.449                   | 0.240                        | 94                                        |

258 Genetic differentiation and structure

259           The overall  $F_{ST}$  was estimated to be 0.016 and pairwise  $F_{ST}$  values between study  
260 areas ranged from -0.002 – 0.054 (Table S6). With this, significant genetic differentiation  
261 was demonstrated in 87 (out of 201, 41.4%) pairwise values. Pairwise gene flow ( $Nm$ )  
262 estimates among study areas ranged from 3.404 – 290.448. 11 pairwise gene flow estimates  
263 were not calculated due to the estimated negative and zero  $F_{ST}$  values. The dendrogram  
264 based on the pairwise  $F_{ST}$  values revealed the spatial pattern and distribution of genetically  
265 similar study areas (Figure 2). Further analysis showed that the optimal number of cluster  
266 groups is 6 where 4 indicated groups of genetically similar study areas. It is shown that  
267 highly genetic-similar study areas are proximal to each other. This is exemplified by  
268 genetic group 2 where mosquito populations in the south area except for LSP-2 are  
269 genetically similar. There are also neighboring study areas that are genetically similar such  
270 as in genetic groups 3 (VAL, CAL-S), 1 (QZC-2 and QZC-4) and 4 (PSG-MRK).  
271 Furthermore, the pattern of the identified genetic groups extends in long distances as  
272 demonstrated in genetic groups 1 and 4.

273           Mantel test between the pairwise genetic ( $F_{ST}$ ) and geographic distances of all study  
274 areas showed very low and non-significant correlation ( $R^2= 0.01$ ,  $p=0.172$ ), indicating no  
275 isolation by distance. High genetic similarity among adult mosquitoes is limited up to 1 km  
276 based on the spatial autocorrelation analysis (Figure S1). This suggests the limited dispersal  
277 capability of *Ae. aegypti*.

278           STRUCTURE analysis found that the most likely number of genetically  
279 differentiated groups is  $K = 5$  (Figure S2). Figure 3 shows the distribution and proportion  
280 of inferred genetic cluster assignment of each mosquito individuals per study area. It is  
281 observed that either 4 or all inferred genetic clusters are present in each study area.

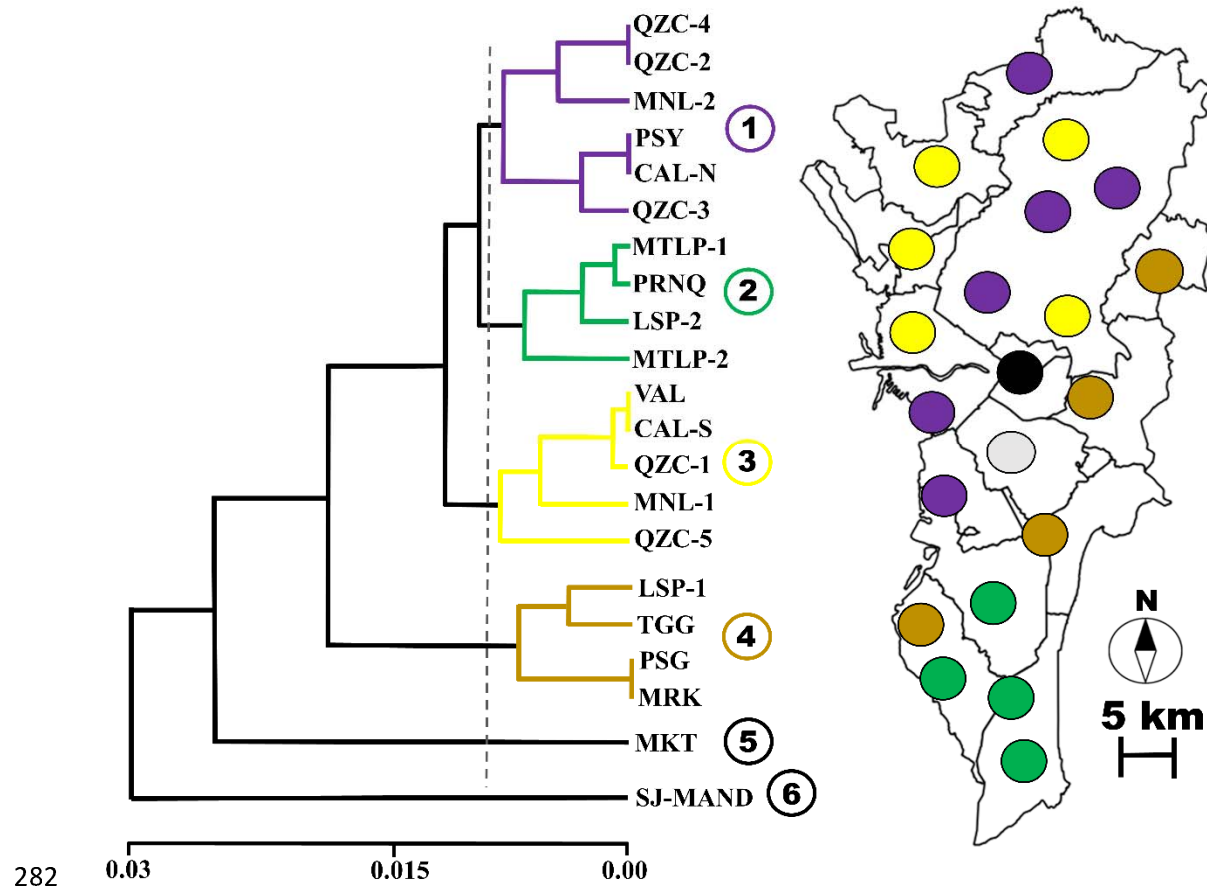

282

283

284 **Figure 2. (a) Dendrogram showing the genetic relatedness of each study area based on**  
285 **its pairwise  $F_{ST}$  estimates. Colored lines indicate the genetic groups. (b) Map showing**  
286 **selected study areas in respect to their genetic group assignment. Colored circles**  
287 **indicate the genetic group.**

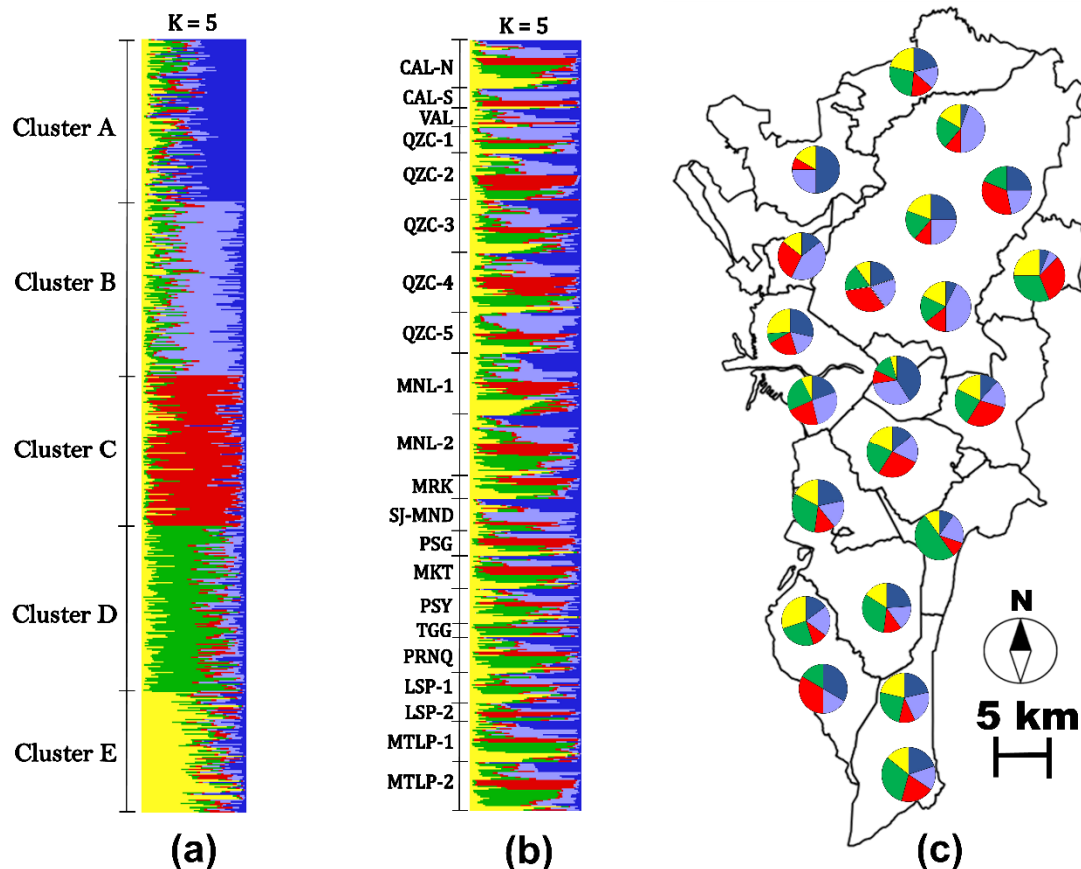

288

289

**Figure 3. Bayesian analysis (K=5) of *Ae aegypti* populations in Metropolitan Manila.**

290

**Bar plots represent the (a) genetic clusters and (b) study areas. Each individual is**

291

**represented by a single horizontal line. Brackets are shown to separate genetic cluster**

292

**or study areas. (c) Spatial map that shows the proportion of all genetic clusters to each**

293

**study area. Colors represent the estimated individual proportion of cluster**

294

**membership.**

295

#### *Correlation between Population Genetic indices and Dengue incidence*

296

Five genetic indices were used to correlate with dengue incidence. It revealed that

297

allelic richness ( $r = 0.30$ ) and  $F_{is}$  ( $r = 0.52$ ) showed a positive correlation to dengue

298

incidence. Among these indices, it was only  $F_{is}$  that showed statistical significance (Figure

299

4). On the other hand, private allelic richness ( $r = -0.14$ ), observed heterozygosity ( $r = -$

300

$0.26$ ) and  $N_e$  ( $r = -0.10$ ) demonstrated a negative correlation with no statistical significance.

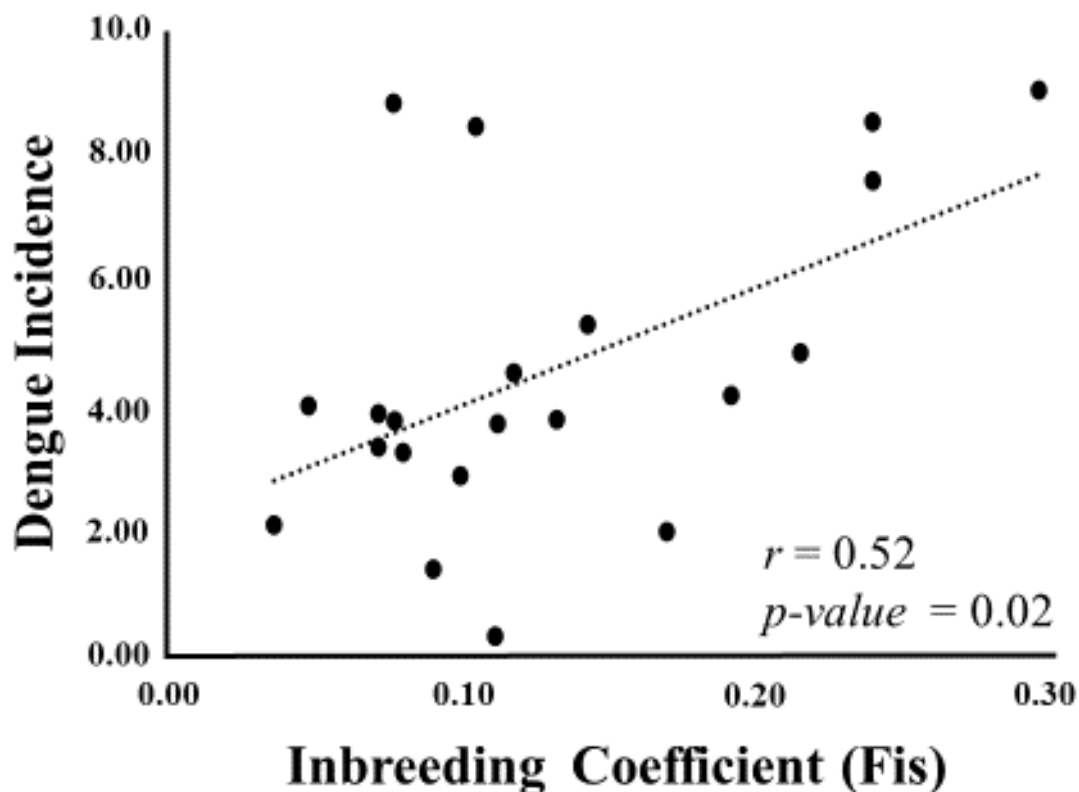

301

302 **Figure 4. Correlation of Dengue Incidence and Inbreeding coefficient (F<sub>IS</sub>) among 21**  
303 **study areas**

## 304 **DISCUSSION**

### 305 *Fine-Scale Genetic Structuring and Dispersal*

306 Our study revealed low genetic differentiation among study areas ( $F_{ST} = 0.006 -$   
307  $0.054$ ) which is similar from previous population genetic studies of *Ae. aegypti* that  
308 consisted of a micro-geographic or fine-scale study area. In Sao Paulo, Brazil, for example,  
309 the level of genetic differentiation ranged from 0.002 to 0.094 with a maximum distance  
310 among collection sites of 30 km [14]. Cities in Southeast Asian countries also showed low  
311 levels of genetic differentiation from 0.026 - 0.032 with a spatial scale of 5 - 50 km [11].

312 The same was observed among villages in Thailand with geographical distances up to 27  
313 km showing an average genetic differentiation of 0.037 [13]. Our findings along with  
314 previous studies suggest that mosquito populations within fine-scale areas may consist of  
315 similar allele frequencies, thus, exhibit continuous and active exchange or sharing of alleles  
316 among study areas. This is corroborated with the high gene flow estimates and the lack of a  
317 detected signal of isolation by distance observed in the study.

318

319 Our constructed dendrogram showed that genetically similar *Ae. aegypti* mosquito  
320 populations are in close proximity with each other. This clustering pattern is highly  
321 exemplified in the southern cities which comprises genetic group 2 (MTLP1, MTLP-2,  
322 PRNQ, LSP-2) and the eastern part of the region (MRK, PSG and TGG). It demonstrates  
323 that the dispersal of *Ae. aegypti* is limited which is also supported by our spatial  
324 autocorrelation analysis. We can only infer such limited dispersal could be attributed by  
325 landscapes in relation to the accessibility and location of each cities. For example, the  
326 southern cities which comprises genetic group 2 (MTLP1, MTLP-2, PRNQ, LSP-2) can  
327 only be accessed by one major highway while majority of the total land size of eastern  
328 cities (MRK, PSG and TGG) are completely separated by a major highway and a river (e.g.  
329 Marikina River). Therefore, access to these southern or eastern cities, may be difficult since  
330 a few roads, highways, or bridges connect it from the rest of the region. For this reason, it  
331 can potentially limit (but not isolate) the continuous migration and genetic exchange of  
332 mosquito populations from other study areas in the entire region. This information provides  
333 the potential migration or dispersal activity of *Ae. aegypti* that can be utilized in defining  
334 specific vector control zones along landscape corridors (e.g. roads) within certain group of  
335 cities.

336

337 What is also notable is that genetically-similar groups can extend in long distances  
338 such as observed in the northern to the central (genetic group 1) and the eastern to the  
339 southern parts (genetic group 4) of the region. If one overlays the major highways and road  
340 networks of Metropolitan Manila, it suggests the “passive” dispersal capability of *Ae.*



341 *aegypti* by human-mediated transportation. It is believed that mosquito vectors occasionally  
342 travel in long distances by taking advantage human-aided transportation routes via land, sea  
343 or air [52,53,54] as *Ae. aegypti* eggs, larvae and adults have been found in commercial  
344 trucks and ships through tire importation [55,56]. In addition, transportation zones such as  
345 airports [57] and docks/ports [54,56] can be littered with larvae and pupae of the mosquito  
346 vector, thus acting as the source population. Rapid urbanization (e.g. commercialization)  
347 may also intensify this long distance migration or passive dispersal of *Ae. aegypti* by  
348 promoting mosquito population admixture over distant areas [15,58].

349

350         Due to the high genetic similarity and migration activity observed among study  
351 areas, we expected a low number of inferred genetic clusters (K=2 at the most). However, it  
352 revealed a considerable number of genetic clusters (K=5). These findings are consistent  
353 with previous population genetic studies with micro-geographic scales [11,14,16] and local  
354 studies in the Philippines [54,59]. Furthermore, these studies reported low genetic  
355 differentiation but with substantial number of inferred genetic clusters (K = 3-9). The  
356 substantial number of genetic clusters in fine-scale areas may be explained by two  
357 hypotheses. The first hypothesis could be the result of divergence from a single ancestry  
358 and, over time, produced multiple genetic clusters in this area. It is argued that a single or  
359 closely-situated houses may act as a clustering unit in forming genetically structured  
360 clusters [11,52,60]. This could be due to the limited flight performance of *Ae. aegypti*  
361 where it prefers to stay within a small area of about 10 – 500 meters [61] for a stable  
362 breeding site and availability of blood hosts [52]. As a result of rapid urbanization, these  
363 distinct genetic mosquito groups may have migrated to distant locations through “passive”  
364 dispersal, establishing colonies thereafter.

365

366         To some extent, our results support the first hypothesis where it revealed the limited  
367 dispersal capability of *Ae. aegypti* in short distances (up to 1 km) based from spatial  
368 autocorrelation analysis and, in turn, may have generated the 5 inferred genetically  
369 structured groups. Since Metropolitan Manila is considered highly urbanized with

370 numerous transportation routes, it could have facilitated the passive dispersal of the  
371 mosquito vector in distant locations based on the interpretation of high gene flow activity  
372 among the study areas. However, limited dispersal cannot only be the single factor that can  
373 explain the occurrence of multiple clusters. Without high mutation, the mosquito  
374 population cannot diversify within a small spatial scale for a short evolutionary time. Hence,  
375 the second hypothesis infers that it could be due to the immigration of mosquito  
376 populations from neighboring regions or provinces of Metropolitan Manila, but a larger  
377 spatial scale genetic data is needed to test this hypothesis.

378

### 379 *Correlation of Genetic indices towards Dengue incidence*

380

381         Among the genetic indices, we expected the estimated population size ( $N_e$ ) to show  
382 a significant and positive correlation. However, it resulted in a non-significant and negative  
383 relationship with dengue incidence. In our study, collecting adult mosquito samples was the  
384 ideal choice to perform a better estimation of the effective population size ( $N_e$ ). Previous  
385 population genetic studies conducted their sampling using either only larval samples or  
386 larval samples reared to adult stages but majority of mosquito larvae do not become adults  
387 in the natural setting [62]. Thus, collecting larvae to estimate the effective population size  
388 of the adult may be deemed inappropriate.

389

390         One possible reason of detecting no correlation between  $N_e$  and dengue incidence  
391 may be that the calculated  $N_e$  is either under- or over-estimated. Estimating the precise  $N_e$   
392 of natural populations can be difficult, especially if there is a large time interval between  
393 sampling points or temporal disruptions such as migration or population replacement. It has  
394 been demonstrated that lower  $N_e$  estimates are generated by the presence of temporal  
395 disruptions while large intervals in sampling points generate higher  $N_e$  estimates [23].  
396 Nevertheless, the calculated  $N_e$  estimates of the study is consistent with those calculated by  
397 Saarman et al. [23] from mosquito populations worldwide. But further and thorough

398 investigation should be performed in the future to correctly estimate the  $N_e$  and its  
399 correlation with dengue incidence.

400

401 Notably, the correlation between dengue incidence and the inbreeding coefficient  
402 ( $F_{is}$ ) revealed a positive and significant correlation ( $r = 0.52$ ,  $p = 0.02$ ). One plausible  
403 mechanism may be due to the transovarial or vertical transmission of the dengue virus to its  
404 succeeding mosquito offspring. This viral transmission process has been demonstrated in  
405 field-collected *Ae. aegypti* mosquitoes until its F2 generation from Quezon City,  
406 Metropolitan Manila [63]. Earlier studies also revealed that the transovarial route can  
407 sustain the viral infection up to the 15<sup>th</sup> generation [64]. Therefore, we infer that the  
408 inbreeding within the mosquito population may result in producing a substantial number of  
409 next generation mosquitoes carrying the dengue virus. This suggests that dengue virus  
410 infection is not only maintained by the human-vector cycle but also within mosquito  
411 generations. Because of such mechanism, it can possibly lead to an increased disease  
412 transmission within local areas. It should be known there are limitations in our  
413 interpretation of this correlation. First, no viral detection was done to each individual *Ae.*  
414 *aegypti* mosquitoes to ascertain their viral transmission capability. Performing this  
415 endeavor could provide the necessary credence that can strongly support such correlation.  
416 Secondly, it is unclear whether the dengue virus infection in the human population  
417 originated from the exact study area. It has been suggested that dengue infections in the  
418 human population especially in urbanized areas can be obtained from other locations such  
419 as public spaces, schools or workplaces rather than their place of residence [65,66,67,68].

420

421 Nonetheless, this is the first attempt to directly link mosquito population genetic  
422 data to epidemiological data. Although several previous studies signified the application of  
423 population genetics towards vector control, they only reported the mosquito gene flow  
424 pattern and the association of mosquito genetic structure and its landscape [54,69,70]. Our  
425 findings may provide future implications in predicting or identifying high dengue risk areas  
426 where the genetic index (e.g.  $F_{is}$ ) can be utilized as a supplementary index with

427 conventional mosquito-based indices. But further research is needed to ascertain on how  
428 these genetic indices can directly influence the local dengue epidemiology.

## 429 REFERENCES

- 430 1. Weaver SC, Reisen WK. Present and future arboviral threats. *Antiviral research*.  
431 2010 Feb 1;85(2):328-45.
- 432 2. World Health Organization: Western Pacific Region (2012) Dengue: dengue in the  
433 Western Pacific region. Available:  
434 [http://www.wpro.who.int/emerging\\_diseases/Dengue/en/index.html](http://www.wpro.who.int/emerging_diseases/Dengue/en/index.html). Accessed June 2017
- 435 3. Arunachalam N, Tewari SC, Thenmozhi V, Rajendran R, Paramasivan R,  
436 Manavalan R, Ayanar K, Tyagi BK. Natural vertical transmission of dengue viruses by  
437 *Aedes aegypti* in Chennai, Tamil Nadu, India. *Indian Journal of Medical Research*. 2008  
438 Apr 1;127(4):395.
- 439 4. Sanofi Pasteur. Sanofi Pasteur's Dengue Vaccine Approved in the Philippines.  
440 Available at: [http://www.sanofipasteur.com/en/articles/sanofi-pasteur-dengue-vaccine-](http://www.sanofipasteur.com/en/articles/sanofi-pasteur-dengue-vaccine-approved-in-thephilippines.aspx)  
441 [approved-in-thephilippines.aspx](http://www.sanofipasteur.com/en/articles/sanofi-pasteur-dengue-vaccine-approved-in-thephilippines.aspx) (2016). Accessed 26 Oct 2017
- 442 5. Hiragi C, Simões K, Martins E, Queiroz P, Lima L, Monnerat R. Genetic variability  
443 in *Aedes aegypti* (L.)(Diptera: Culicidae) populations using RAPD markers. *Neotropical*  
444 *entomology*. 2009 Aug;38(4):542-7.
- 445 6. Urdaneta-Marquez L, Failloux AB. Population genetic structure of *Aedes aegypti*,  
446 the principal vector of dengue viruses. *Infection, Genetics and Evolution*. 2011 Mar  
447 1;11(2):253-61.
- 448 7. Huber K, Le Loan L, Hoang TH, Tien TK, Rodhain F, Failloux AB. Temporal  
449 genetic variation in *Aedes aegypti* populations in ho chi Minh City (Vietnam). *Heredity*.  
450 2002 Jul;89(1):7.
- 451 8. Ravel S, Monteny N, Olmos DV, Verdugo JE, Cuny G. A preliminary study of the  
452 population genetics of *Aedes aegypti* (Diptera: Culicidae) from Mexico using microsatellite  
453 and AFLP markers. *Acta Tropica*. 2001 Mar 30;78(3):241-50.
- 454 9. Rašić G, Filipović I, Weeks AR, Hoffmann AA. Genome-wide SNPs lead to strong  
455 signals of geographic structure and relatedness patterns in the major arbovirus vector,  
456 *Aedes aegypti*. *BMC genomics*. 2014 Dec;15(1):275.
- 457 10. Chambers EW, Meece JK, McGowan JA, Lovin DD, Hemme RR, Chadee DD,  
458 McAbee K, Brown SE, Knudson DL, Severson DW. Microsatellite isolation and linkage

- 459 group identification in the yellow fever mosquito *Aedes aegypti*. *Journal of Heredity*. 2007  
460 Apr 9;98(3):202-10.
- 461 11. Hlaing T, Tun Lin W, Somboon P, Socheat D, Setha T, Min S, Thaung S, Anyaele  
462 O, De Silva B, Chang MS, Prakash A. Spatial genetic structure of *Aedes aegypti*  
463 mosquitoes in mainland Southeast Asia. *Evolutionary applications*. 2010 Jul 1;3(4):319-39.
- 464 12. Vidal PO, Suesdek L. Comparison of wing geometry data and genetic data for  
465 assessing the population structure of *Aedes aegypti*. *Infection, Genetics and Evolution*.  
466 2012 Apr 1;12(3):591-6.
- 467 13. Olanratmanee P, Kittayapong P, Chansang C, Hoffmann AA, Weeks AR, Endersby  
468 NM. Population genetic structure of *Aedes (Stegomyia) aegypti* (L.) at a micro-spatial scale  
469 in Thailand: implications for a dengue suppression strategy. *PLoS neglected tropical*  
470 *diseases*. 2013 Jan 10;7(1):e1913.
- 471 14. Wilke AB, Wilk-da-Silva R, Marrelli MT. Microgeographic population structuring  
472 of *Aedes aegypti* (Diptera: Culicidae). *PloS one*. 2017 Sep 20;12(9):e0185150.
- 473 15. Paupy C, Chantha N, Huber K, Lecoz N, Reynes JM, Rodhain F, Failloux AB.  
474 Influence of breeding sites features on genetic differentiation of *Aedes aegypti* populations  
475 analyzed on a local scale in Phnom Penh Municipality of Cambodia. *The American journal*  
476 *of tropical medicine and hygiene*. 2004 Jul 1;71(1):73-81
- 477 16. Louise C, Vidal PO, Suesdek L. Microevolution of *Aedes aegypti*. *Plos one*. 2015  
478 Sep 11;10(9):e0137851.
- 479 17. Shi QM, Zhang HD, Wang G, Guo XX, Xing D, Dong YD, Xiao L, Gao J, Liu QM,  
480 Sun AJ, Li CX. The genetic diversity and population structure of domestic *Aedes aegypti*  
481 (Diptera: Culicidae) in Yunnan Province, southwestern China. *Parasites & vectors*. 2017  
482 Dec;10(1):292.
- 483 18. Bowman LR, Runge-Ranzinger S, McCall PJ. Assessing the relationship between  
484 vector indices and dengue transmission: a systematic review of the evidence. *PLoS*  
485 *neglected tropical diseases*. 2014 May 8;8(5):e2848.
- 486 19. KM, Versteirt V, Cull B, Kampen H, Fontenille D, Hendrickx G, Zeller H, Van  
487 Bortel W, Schaffner F. An entomological review of invasive mosquitoes in Europe.  
488 *Bulletin of entomological research*. 2015 Dec;105(6):637-63.
- 489 20. Ritchie SA, Cortis G, Paton C, Townsend M, Shroyer D, Zborowski P, Hall-  
490 Mendelin S, Van Den Hurk AF. A simple non-powered passive trap for the collection of  
491 mosquitoes for arbovirus surveillance. *Journal of medical entomology*. 2013 Jan  
492 1;50(1):185-94.

- 493 21. Williams CR, Johnson PH, Ball TS, Ritchie SA. Productivity and population  
494 density estimates of the dengue vector mosquito *Aedes aegypti* (*Stegomyia aegypti*) in  
495 Australia. *Medical and veterinary entomology*. 2013 Sep;27(3):313-22.
- 496 22. Massad E, Amaku M, Coutinho FA, Struchiner CJ, Lopez LF, Wilder-Smith A,  
497 Burattini MN. Estimating the size of *Aedes aegypti* populations from dengue incidence  
498 data: Implications for the risk of yellow fever outbreaks. *Infectious Disease Modelling*.  
499 2017 Nov 1;2(4):441-54.
- 500 23. Saarman NP, Gloria Soria A, Anderson EC, Evans BR, Pless E, Cosme LV,  
501 Gonzalez Acosta C, Kamgang B, Wesson DM, Powell JR. Effective population sizes of a  
502 major vector of human diseases, *Aedes aegypti*. *Evolutionary applications*. 2017  
503 Dec;10(10):1031-9.
- 504 24. Endersby NM, Hoffmann AA, White VL, Ritchie SA, Johnson PH, Weeks AR.  
505 Changes in the genetic structure of *Aedes aegypti* (Diptera: Culicidae) populations in  
506 Queensland, Australia, across two seasons: implications for potential mosquito releases.  
507 *Journal of Medical Entomology*. 2011 Sep 1;48(5):999-1007.
- 508 25. Hale ML, Burg TM, Steeves TE. Sampling for microsatellite-based population  
509 genetic studies: 25 to 30 individuals per population is enough to accurately estimate allele  
510 frequencies. *PloS one*. 2012 Sep 12;7(9):e45170.
- 511 26. Philippine Statistics Authority: Population and Housing. <http://psa.gov.ph/> (2016).  
512 Accessed on Jun 2016
- 513 27. Asia Development Bank. Urban metabolism of six Asian cities: Metro Manila.  
514 Mandaluyong City, Philippines: Asian Development Bank. 2014 pp. 29-34
- 515 28. Philippine GIS Data Clearinghouse. National Capital Region. Available online:  
516 [www.philgis.org](http://www.philgis.org) (accessed on 8 November 2015)
- 517 29. Rueda LM. Pictorial keys for the identification of mosquitoes (Diptera: Culicidae)  
518 associated with dengue virus transmission. Walter Reed Army Inst Of Research  
519 Washington Dc Department Of Entomology; 2004 Aug 3.
- 520 30. Allendorf FW, Phelps SR. Use of allelic frequencies to describe population  
521 structure. *Canadian Journal of Fisheries and Aquatic Sciences*. 1981 Dec 1;38(12):1507-14.
- 522 31. Peterman W, Brocato ER, Semlitsch RD, Eggert LS. Reducing bias in population  
523 and landscape genetic inferences: the effects of sampling related individuals and multiple  
524 life stages. *PeerJ*. 2016 Mar 14;4:e1813.

- 525 32. Goldberg CS, Waits LP. Quantification and reduction of bias from sampling larvae  
526 to infer population and landscape genetic structure. *Molecular Ecology Resources*. 2010  
527 Mar;10(2):304-13.
- 528 33. Crane S. DNA Extraction From Archival Museum Insect Specimens. 2011.  
529 Accessed Mar 2015. Available from: [https://s3-eu-west-1.amazonaws.com/pfigshare-u-](https://s3-eu-west-1.amazonaws.com/pfigshare-u-files/1114092/extractionmuseum.pdf)  
530 [files/1114092/extractionmuseum.pdf](https://s3-eu-west-1.amazonaws.com/pfigshare-u-files/1114092/extractionmuseum.pdf)
- 531 34. Slotman MA, Kelly NB, Harrington LC, Kitthawee S, Jones JW, Scott TW,  
532 Caccone A, Powell JR. Polymorphic microsatellite markers for studies of *Aedes aegypti*  
533 (Diptera: Culicidae), the vector of dengue and yellow fever. *Molecular Ecology Resources*.  
534 2007 Jan 1;7(1):168-71.
- 535 35. Van Oosterhout C, Hutchinson WF, Wills DP, Shipley P. MICROCHECKER:  
536 software for identifying and correcting genotyping errors in microsatellite data. *Molecular*  
537 *Ecology Resources*. 2004 Sep 1;4(3):535-8
- 538 36. Rousset F. genepop'007: a complete reimplementation of the genepop software  
539 for Windows and Linux. *Molecular ecology resources*. 2008 Jan 1;8(1):103-6.
- 540 37. Rousset F. GENEPOP (Version 1.2): Population genetics software for exact tests  
541 and ecumenicalism. *J. Hered* .. 1995; 83: 239.
- 542 38. Kalinowski ST. Counting alleles with rarefaction: private alleles and hierarchical  
543 sampling designs. *Conservation genetics*. 2004 Aug 1;5(4):539-43.
- 544 39. Kalinowski ST. hp-rare 1.0: a computer program for performing rarefaction on  
545 measures of allelic richness. *Molecular Ecology Resources*. 2005 Mar 1;5(1):187-9.
- 546 40. Peakall R, Smouse PE. GenAlEx 6.5: genetic analysis in Excel. Population genetic  
547 software for teaching and researchdan update. *Bioinformatics* 28, 2537e2539.
- 548 41. Excoffier L, Lischer HE. Arlequin suite ver 3.5: a new series of programs to  
549 perform population genetics analyses under Linux and Windows. *Molecular ecology*  
550 *resources*. 2010 May 1;10(3):564-7.
- 551 42. Slatkin M, Barton NH. A comparison of three indirect methods for estimating  
552 average levels of gene flow. *Evolution*. 1989 Nov 1;43(7):1349-68.
- 553 43. Müllner D. fastcluster: Fast hierarchical, agglomerative clustering routines for R  
554 and Python. *Journal of Statistical Software*. 2013 May 29;53(9):1-8.
- 555 44. Charrad M, Ghazzali N, Boiteau V, Niknafs A, Charrad MM. Package 'NbClust'.  
556 *Journal of Statistical Software*. 2014 Oct 15;61:1-36.

- 557 45. R Development Core Team. R: A language and environment for statistical  
558 computing. R Foundation for Statistical Computing, Vienna, Austria. 2016.
- 559 46. Pritchard JK, Stephens M, Donnelly P (2000) Inference of population structure  
560 using multilocus genotype data. *Genetics* 155: 945–959. pmid:10835412
- 561 47. Earl DA, vonHoldt BM (2012) STRUCTURE HARVESTER: a website and  
562 program for visualizing STRUCTURE output and implementing the Evanno method.  
563 *Conservation Genetics Resources* 4: 359–361.
- 564 48. Evanno G, Regnaut S, Goudet J. Detecting the number of clusters of individuals  
565 using the software structure: a simulation study. *Mol Ecol.* 2005;14: 2611–2620.  
566 pmid:15969739
- 567 49. Jakobsson M, Rosenberg NA. CLUMPP: a cluster matching and permutation  
568 program for dealing with label switching and multimodality in analysis of population  
569 structure. *Bioinformatics.* 2007 May 7;23(14):1801-6.
- 570 50. Rosenberg NA. DISTRUCT: a program for the graphical display of population  
571 structure. *Molecular Ecology Resources.* 2004 Mar 1;4(1):137-8.
- 572 51. Vincenty T. Direct and inverse solutions of geodesics on the ellipsoid with  
573 application of nested equations. *Survey review.* 1975 Apr 1;23(176):88-93.
- 574 52. Brown JE, Evans BR, Zheng W, Obas V, Barrera-Martinez L, Egizi A, Zhao H,  
575 Caccone A, Powell JR. Human impacts have shaped historical and recent evolution in  
576 *Aedes aegypti*, the dengue and yellow fever mosquito. *Evolution.* 2014 Feb 1;68(2):514-25.
- 577 53. Egizi A, Kiser J, Abadam C, Fonseca DM. The hitchhiker's guide to becoming  
578 invasive: exotic mosquitoes spread across a US state by human transport not autonomous  
579 flight. *Molecular ecology.* 2016 Jul 1;25(13):3033-47.
- 580 54. Fonzi E, Higa Y, Bertuso AG, Futami K, Minakawa N. Human-mediated marine  
581 dispersal influences the population structure of *Aedes aegypti* in the Philippine Archipelago.  
582 *PLoS neglected tropical diseases.* 2015 Jun 3;9(6):e0003829.
- 583 55. Chadee DD. Seasonal incidence and horizontal distribution patterns of oviposition  
584 by *Aedes aegypti* in an urban environment in Trinidad, west Indies. *Journal of the*  
585 *American Mosquito Control Association.* 1992 Sep 1;8(3):281-4.
- 586 56. Suleman M, Arshad M, Khan K. Yellowfever mosquito (Diptera: Culicidae)  
587 introduced into Landi Kotal, Pakistan, by tire importation. *Journal of medical entomology.*  
588 1996 Jul 1;33(4):689-93.
- 589 57. Sukehiro N, Kida N, Umezawa M, Murakami T, Arai N, Jinnai T, Inagaki S,  
590 Tsuchiya H, Maruyama H, Tsuda Y. First report on invasion of yellow fever mosquito,



- 591 *Aedes aegypti*, at Narita International Airport, Japan in August 2012. Japanese journal of  
592 infectious diseases. 2013;66(3):189-94.
- 593 58. Gubler DJ. Prevention and control of *Aedes aegypti*-borne diseases: lesson learned  
594 from past successes and failures. *AsPac J Mol Biol Biotechnol*. 2011;19(3):111-4.
- 595 59. Sayson SL, Gloria-Soria A, Powell JR, Edillo FE. Seasonal genetic changes of  
596 *Aedes aegypti* (Diptera: Culicidae) populations in selected sites of Cebu City, Philippines.  
597 *Journal of medical entomology*. 2015 Aug 14;52(4):638-46.
- 598 60. Getis A, Morrison AC, Gray K, Scott TW. Characteristics of the spatial pattern of  
599 the dengue vector, *Aedes aegypti*, in Iquitos, Peru. In *Perspectives on Spatial Data Analysis*  
600 2010 (pp. 203-225). Springer, Berlin, Heidelberg.
- 601 61. Reiter P, Amador MA, Anderson RA, Clark GG. Dispersal of *Aedes aegypti* in an  
602 urban area after blood feeding as demonstrated by rubidium-marked eggs. *The American*  
603 *journal of tropical medicine and hygiene*. 1995 Feb 1;52(2):177-9.
- 604 62. Hammond SN, Gordon AL, Lugo ED, Moreno G, Kuan GM, López MM, López JD,  
605 Delgado MA, Valle SI, Espinoza PM, Harris E. Characterization of *Aedes aegypti* (Diptera:  
606 Culicidae) production sites in urban Nicaragua. *Journal of medical entomology*. 2007 Sep  
607 1;44(5):851-60.
- 608 63. Bawalan RJ, Salazar N, Heralde F. Transovarial Transmission of Dengue Virus in  
609 *Aedes aegypti*: A Case in Quezon City, Philippines. *Acta medica Philippina* 2014 Dec  
610 48(4):23-29
- 611 64. Obra G. Development of Sterile Insect Technique for Dengue Mosquito Vector,  
612 *Aedes aegypti* using Gamma Irradiation. *Proceedings of NRCP-Symposium on Dengue*  
613 *Researches*. December 2014. The Bayleaf, Intramuros, Manila
- 614 65. Guedes DR, Cordeiro MT, Melo-Santos MA, Magalhaes T, Marques E, Regis L,  
615 Furtado AF, Ayres CF, 2010. Patient-based dengue virus surveillance in *Aedes aegypti*  
616 from Recife, Brazil. *J Vector Borne Dis* 47: 67-75.
- 617 66. Stoddard ST, Morrison AC, Vazquez-Prokopec GM, Paz-Soldan V, Kochel TJ,  
618 Kitron U, Elder JP, Scott TW, 2009. The role of human movement in the transmission of  
619 vector-borne pathogens. *PLoS Negl Trop Dis* 3(7): e481.
- 620 67. Stoddard ST, et al., 2013. House-to-house human movement drives dengue virus  
621 transmission. *Proc Natl Acad Sci USA* 110(3): 994-999.
- 622 68. Zarate-Nahon EA, et al., 2013. *Aedes aegypti* mosquitoes at nonresidential sites  
623 might be related to transmission of dengue virus in Monterrey, Northeastern Mexico.  
624 *Southwest Entomol* 38(3): 465-476

625 69. Hemme RR, Thomas CL, Chadee DD, Severson DW. Influence of urban landscapes  
626 on population dynamics in a short-distance migrant mosquito: evidence for the dengue  
627 vector *Aedes aegypti*. PLoS Neglected Tropical Diseases. 2010 Mar 16;4(3):e634.

628 70. Dutra HL, dos Santos LM, Caragata EP, Silva JB, Villela DA, Maciel-de-Freitas R,  
629 Moreira LA. From lab to field: the influence of urban landscapes on the invasive potential  
630 of *Wolbachia* in Brazilian *Aedes aegypti* mosquitoes. PLoS neglected tropical diseases.  
631 2015 Apr 23;9(4):e0003689.

632

### 633 SUPPORTING INFORMATION

634

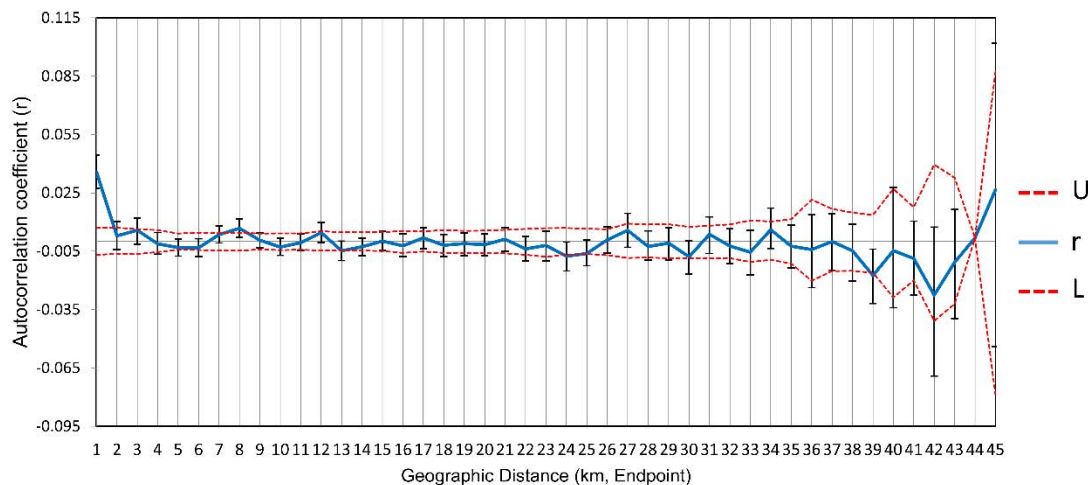

635

636 **Figure S1.** Correlogram of spatial autocorrelation showing the coefficient (r) up to 45 km  
637 with 1km intervals. U and L are upper and lower confidence interval limit respectively.

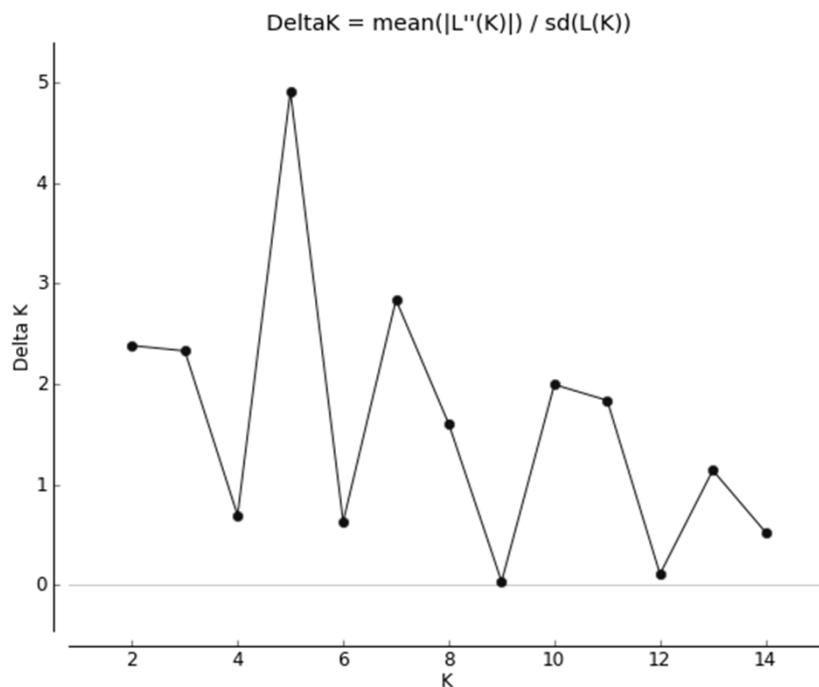

638

639 **Figure S2.** Graph of  $\Delta K$  against  $K$  showing  $K = 5$  as the probable number of genetic  
640 clusters

641 **Table S1.** *Ae aegypti* collection sites and population size in Metropolitan Manila,  
642 Philippines

643 **Table S2.** List and Characteristics of Microsatellites markers in *Ae. aegypti* used in this  
644 study

645 **Table S3.** Analysis of the Genetic Diversity of *Ae aegypti* using 11 microsatellite loci

646 **Table S4.** Null allele frequency estimates per locus per *Ae aegypti* populations

647 **Table S5.** Allele frequencies of the 11 microsatellite loci in *Ae aegypti* populations in  
648 Metropolitan Manila

649 **Table S6.** Genetic differentiation using  $F_{ST}$  (below diagonal) and Gene flow ( $Nm$ ) (above  
650 diagonal) of *Ae aegypti* populations in Metropolitan Manila, Philippines
